# Supplementary material for: Synthesis and Application of New Salan Titanium Complexes in the Catalytic Reduction of Aldehydes
Source: Molecules. 2022 Oct 12;27(20):6821. doi: 10.3390/molecules27206821 (PMC9610537; doi:10.3390/molecules27206821)
Supplement: Supplementary file 1 [file molecules-27-06821-s001.zip › molecules-1943628-supplementary.pdf]

# Synthesis and Application of New Salan Titanium Complexes in the Catalytic Reduction of Aldehydes

Joana Hipólito <sup>1</sup>, Ana M. Martins <sup>1,\*</sup> and Luis G. Alves <sup>2,\*</sup>

<sup>1</sup> Centro de Química Estrutural, Instituto Superior Técnico, Universidade de Lisboa, Av. Rovisco Pais 1, 1049-001 Lisboa, Portugal

<sup>2</sup> Centro de Química Estrutural—Institute of Molecular Sciences, Associação do Instituto Superior Técnico para a Investigação e Desenvolvimento, Av. Rovisco Pais 1, 1049-003 Lisboa, Portugal

\* Correspondence: ana.martins@tecnico.ulisboa.pt (A.M.M.); luis.g.alves@tecnico.ulisboa.pt (L.G.A.)

## Single crystal X-ray diffraction analysis of compound 2

Crystals of compound **2** suitable for X-ray diffraction were obtained from a concentrated benzene solution at room temperature. The solid-state molecular structure of **2** is stabilized by the formation of intramolecular hydrogen bonds between the OH groups of the phenols and the N atoms of the amine moieties (see Figure S1). Such interactions show O(1)-H(1O)···N(1) and O(2)-H(2O)···N(2) bond lengths of 2.06 and 1.92 Å, respectively, and define two 6-member heterocycles.

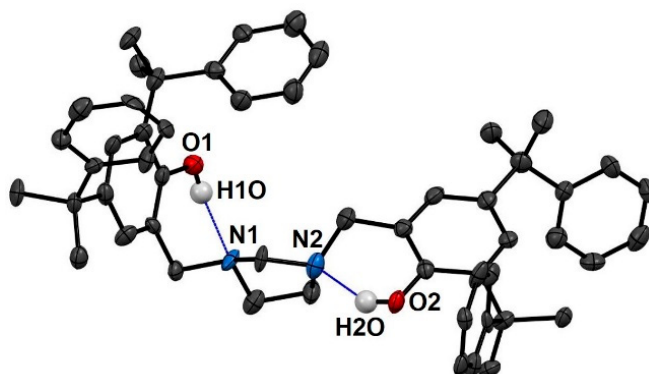

**Figure S1.** ORTEP diagram of **2** showing thermal ellipsoids at 40% probability level. Selected hydrogens atoms and co-crystallized solvent molecules were omitted for clarity.

**Table S1** - Crystal data and structure refinement for compound **2**.

| Compound                    | <b>2</b> ·(C <sub>6</sub> H <sub>6</sub> ) <sub>1.5</sub>     |
|-----------------------------|---------------------------------------------------------------|
| Empirical formula           | C <sub>62</sub> H <sub>69</sub> N <sub>2</sub> O <sub>2</sub> |
| Formula weight              | 874.19                                                        |
| Temperature (K)             | 150(2)                                                        |
| Wavelength (Å)              | 0.71073                                                       |
| Crystal system, space group | Triclinic, P-1                                                |
| <i>a</i> (Å)                | 10.802(7)                                                     |
| <i>b</i> (Å)                | 13.802(7)                                                     |
| <i>c</i> (Å)                | 17.804(9)                                                     |
| α(°)                        | 72.03(3)                                                      |
| β(°)                        | 89.71(4)                                                      |
| γ(°)                        | 81.14(3)                                                      |
| Volume (Å <sup>3</sup> )    | 2492(2)                                                       |

|                                                                           |                                                                 |
|---------------------------------------------------------------------------|-----------------------------------------------------------------|
| Z                                                                         | 2                                                               |
| Calculated density (g m <sup>-3</sup> )                                   | 1.165                                                           |
| Absorption coefficient (mm <sup>-1</sup> )                                | 0.069                                                           |
| <i>F</i> (000)                                                            | 942                                                             |
| Crystal size (mm)                                                         | 0.10 x 0.20 x 0.20                                              |
| $\theta$ range for data collection (°)                                    | 1.571 – 25.835                                                  |
| Limiting indices                                                          | -12 ≤ <i>h</i> ≤ 12, -15 ≤ <i>k</i> ≤ 16, -21 ≤ <i>l</i> ≤ 21   |
| Reflections collected/unique                                              | 19307/7916 [ <i>R</i> <sub>int</sub> = 0.2103]                  |
| Completeness to $\theta$ = 25.242                                         | 86.0                                                            |
| Data/restraints/parameters                                                | 7916/0/605                                                      |
| Goodness-of-fit on <i>F</i> <sup>2</sup>                                  | 0.863                                                           |
| Final <i>R</i> indices [ <i>I</i> > 2 $\sigma$ ( <i>I</i> )] <sup>a</sup> | <i>R</i> <sub>1</sub> = 0.1055, <i>wR</i> <sub>2</sub> = 0.2183 |
| <i>R</i> indices (all data) <sup>a</sup>                                  | <i>R</i> <sub>1</sub> = 0.3046, <i>wR</i> <sub>2</sub> = 0.2781 |
| Largest diff. peak/hole (e Å <sup>-3</sup> )                              | 0.307 and -0.379                                                |

<sup>a</sup>  $R_1 = \sum ||F_o| - |F_c|| / \sum |F_o|$ ;  $wR_2 = \{\sum [w(F_o^2 - F_c^2)^2] / \sum [w(F_o^2)^2]\}^{1/2}$

### NMR spectra of compounds 1-6

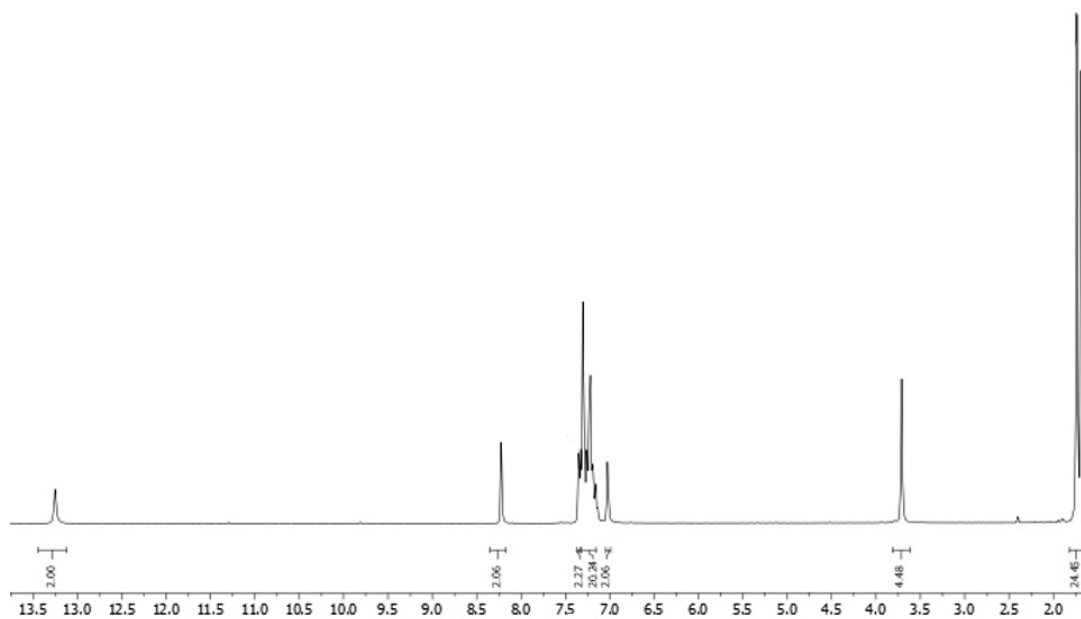

**Figure S2A.** <sup>1</sup>H NMR spectrum of **1** in CDCl<sub>3</sub>.

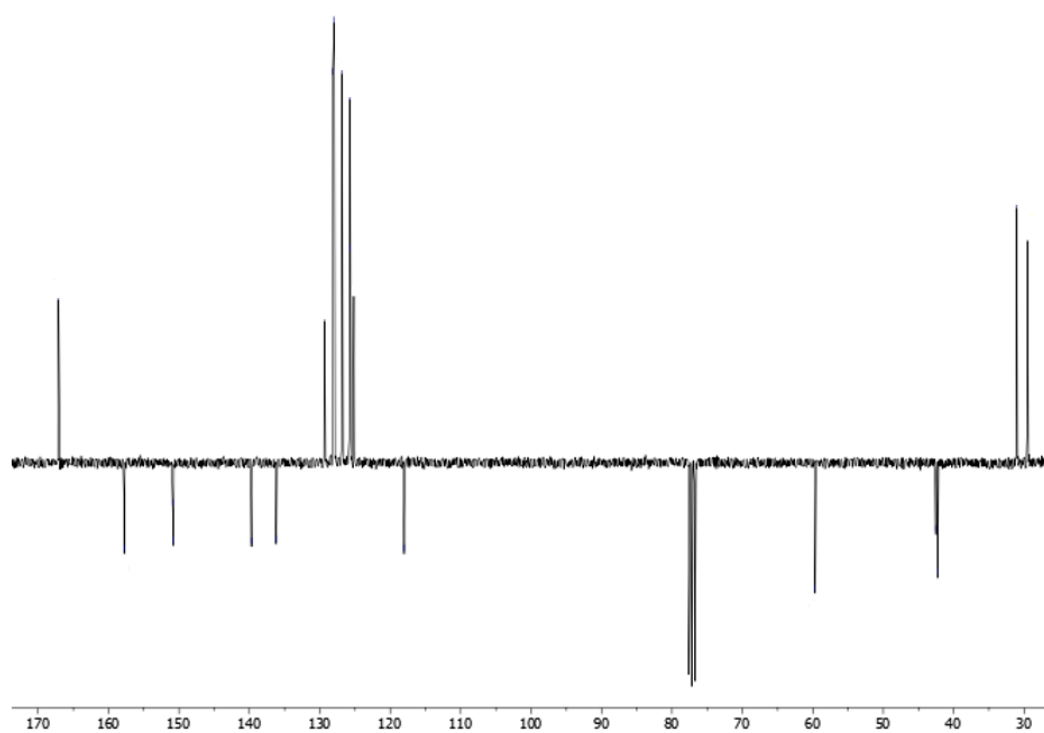

Figure S2B.  $^{13}\text{C}\{^1\text{H}\}$  NMR spectrum of **1** in  $\text{CDCl}_3$ .

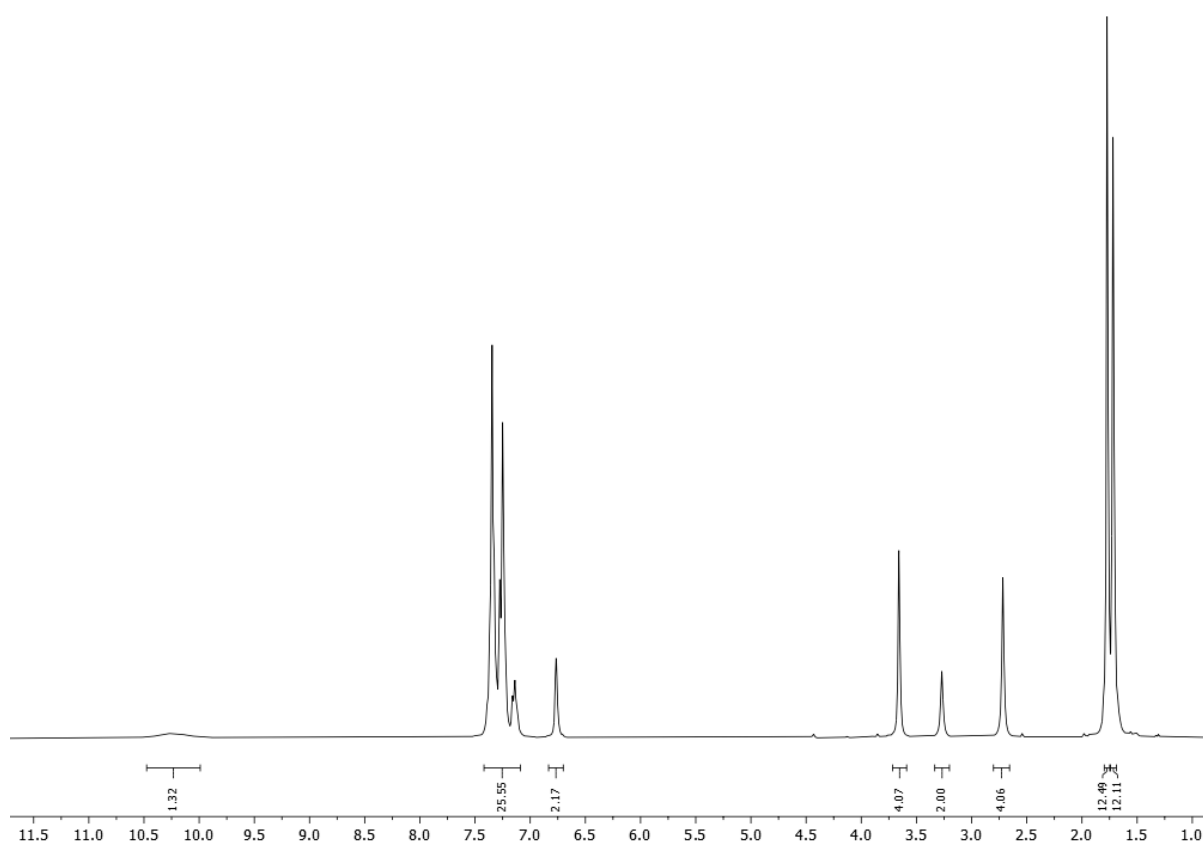

Figure S3A.  $^1\text{H}$  NMR spectrum of **2** in  $\text{CDCl}_3$ .

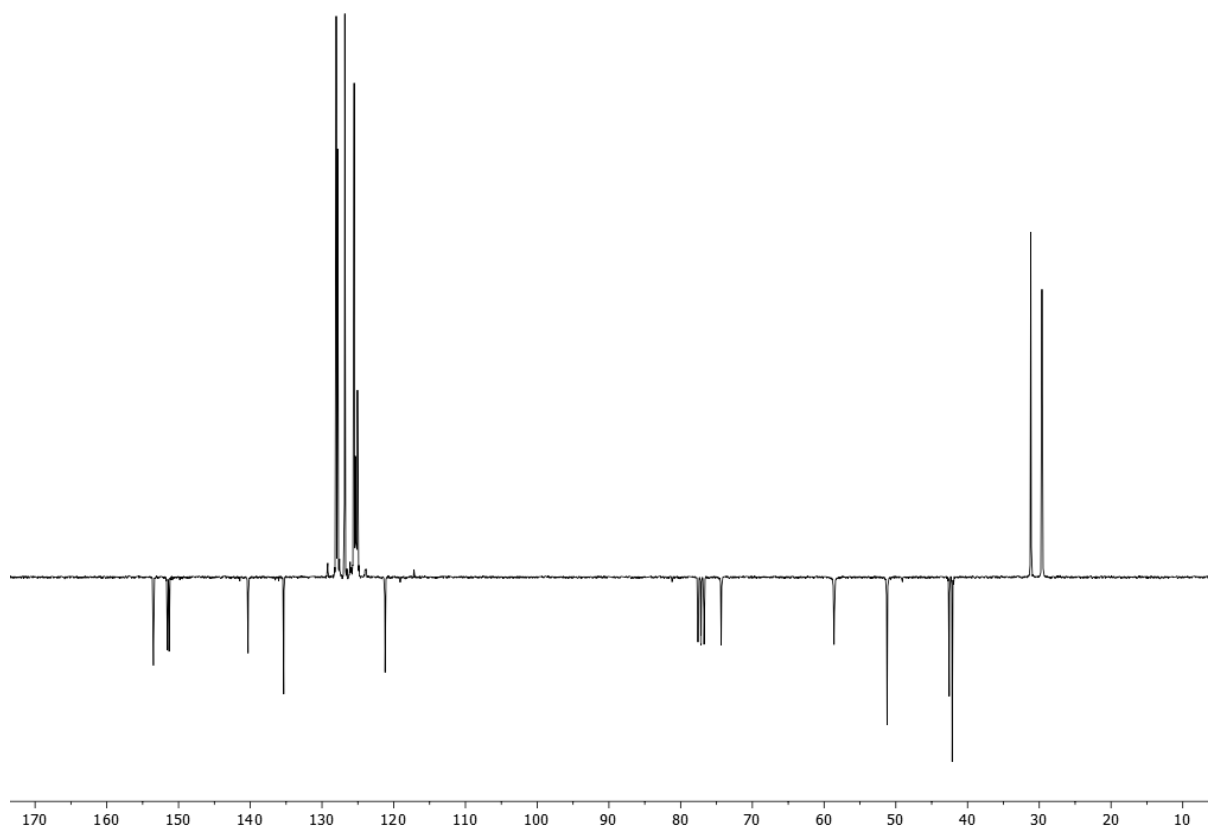

**Figure S3B.**  $^{13}\text{C}\{^1\text{H}\}$  NMR spectrum of **2** in  $\text{CDCl}_3$ .

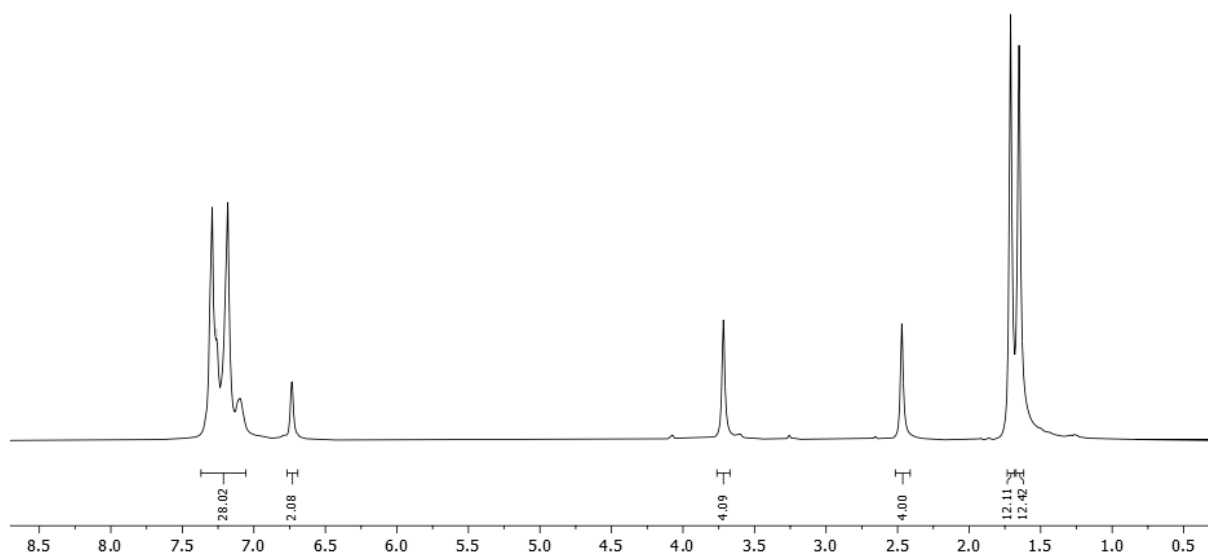

**Figure S4A.**  $^1\text{H}$  NMR spectrum of **3** in  $\text{CDCl}_3$ .

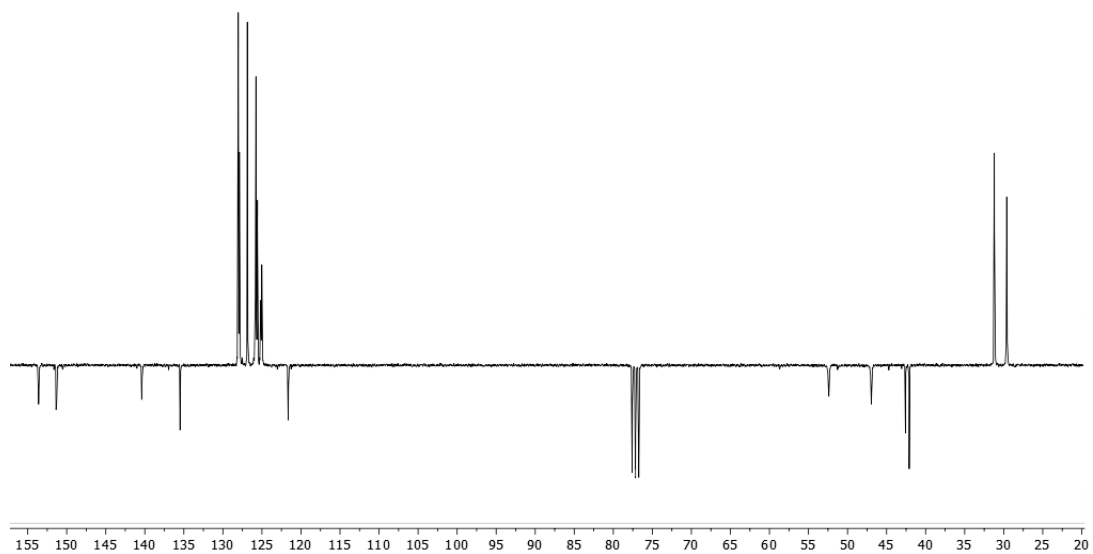

**Figure S4B.**  $^{13}\text{C}\{^1\text{H}\}$  NMR spectrum of **3** in  $\text{CDCl}_3$ .

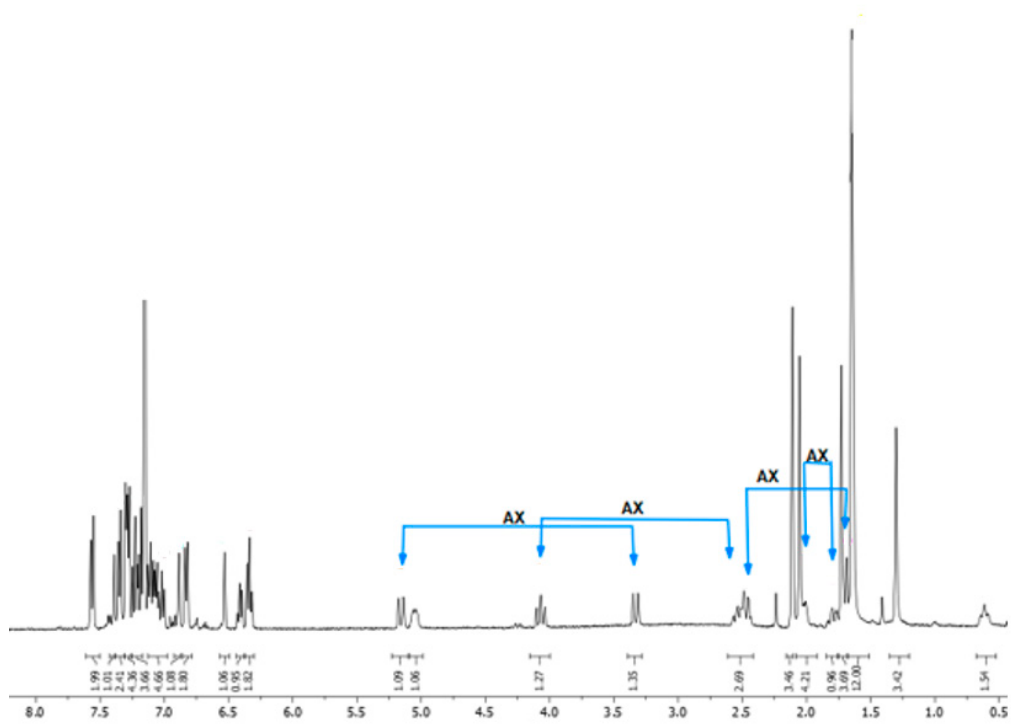

**Figure S5A.**  $^1\text{H}$  NMR spectrum of **4** in  $\text{C}_6\text{D}_6$ .

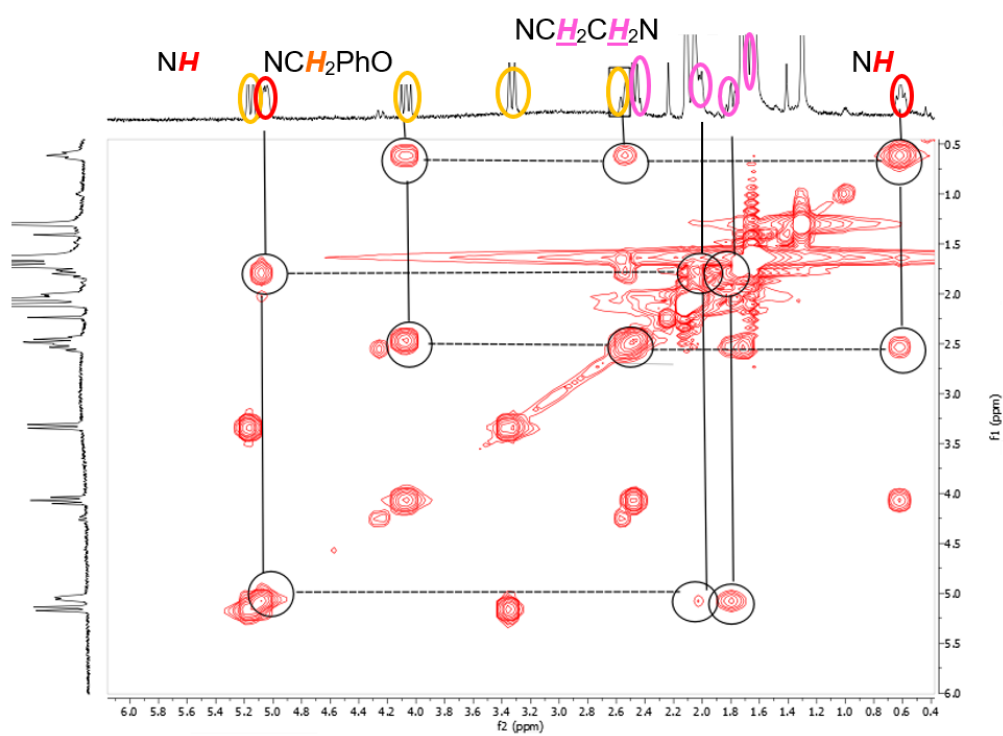

Figure S5B.  $^1\text{H}$ - $^1\text{H}$  COSY NMR spectrum of **4** in  $\text{C}_6\text{D}_6$

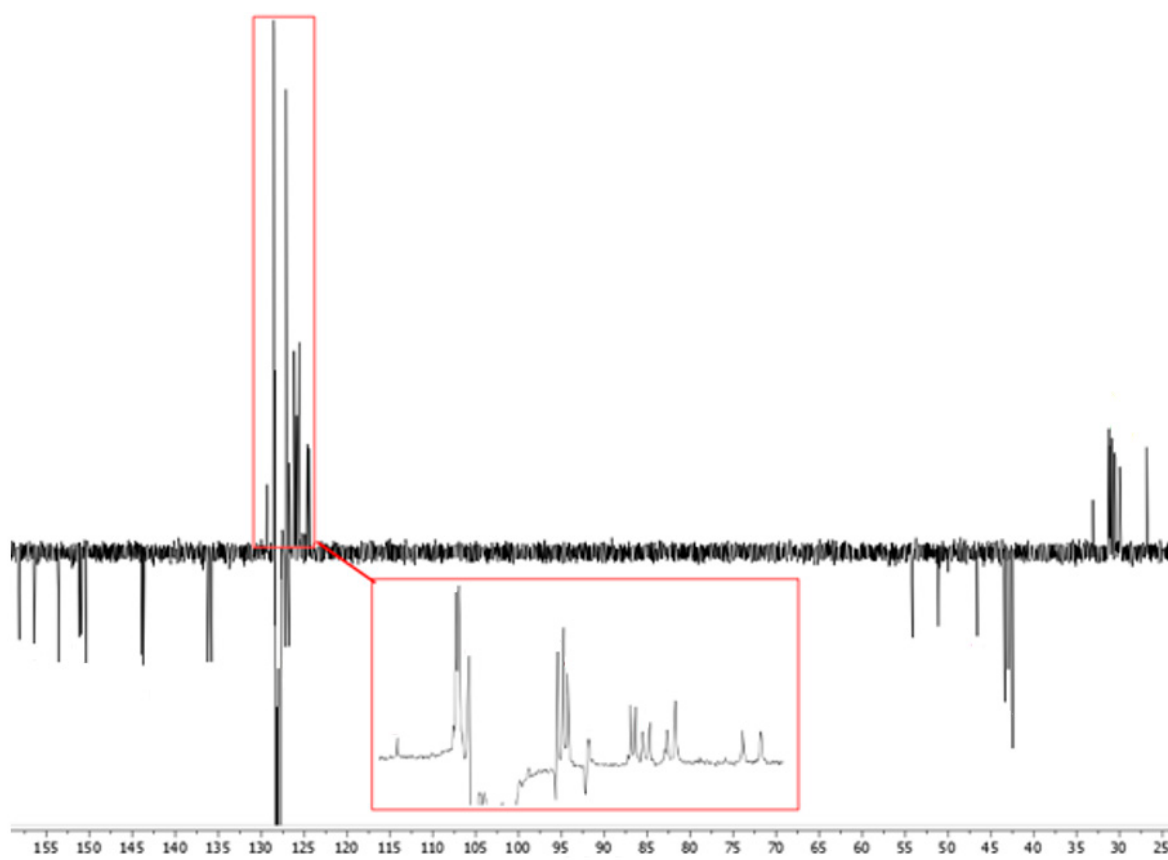

Figure S5C.  $^{13}\text{C}\{^1\text{H}\}$  NMR spectrum of **4** in  $\text{C}_6\text{D}_6$ .

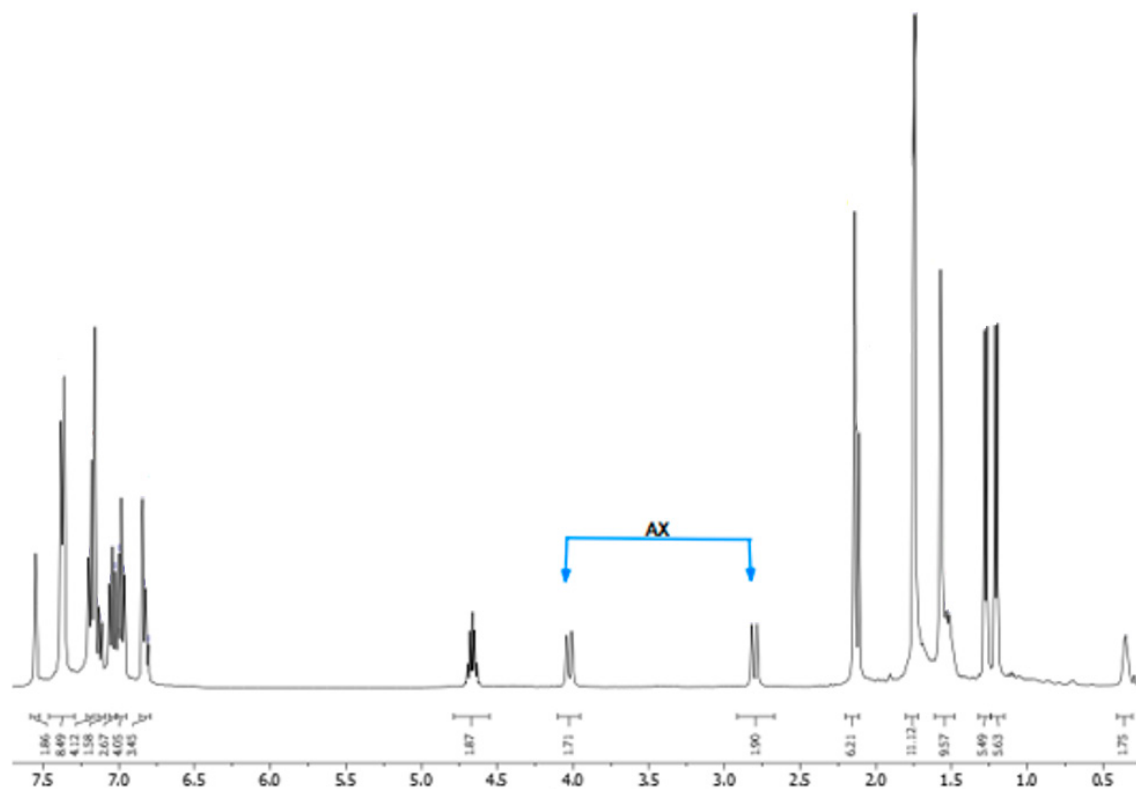

Figure S6A. <sup>1</sup>H NMR spectrum of 5 in C<sub>6</sub>D<sub>6</sub>.

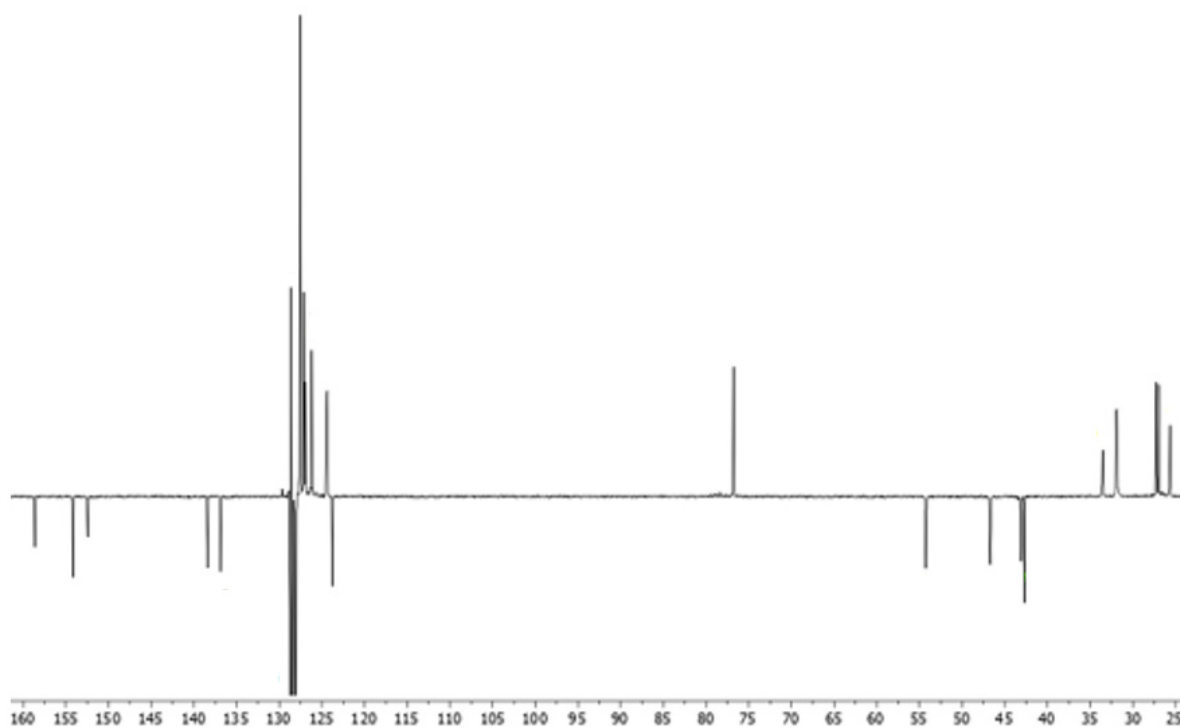

Figure S6B. <sup>13</sup>C{<sup>1</sup>H} NMR spectrum of 5 in C<sub>6</sub>D<sub>6</sub>.

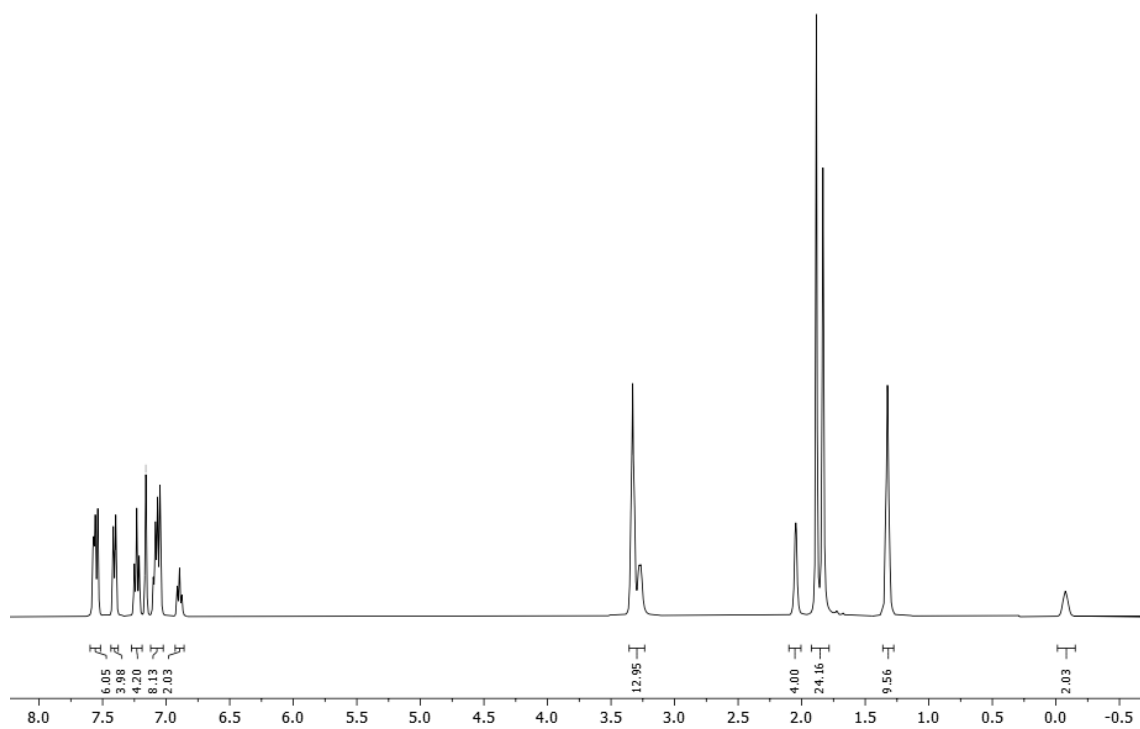

**Figure S7A.** <sup>1</sup>H NMR spectrum of **6** in C<sub>6</sub>D<sub>6</sub>.

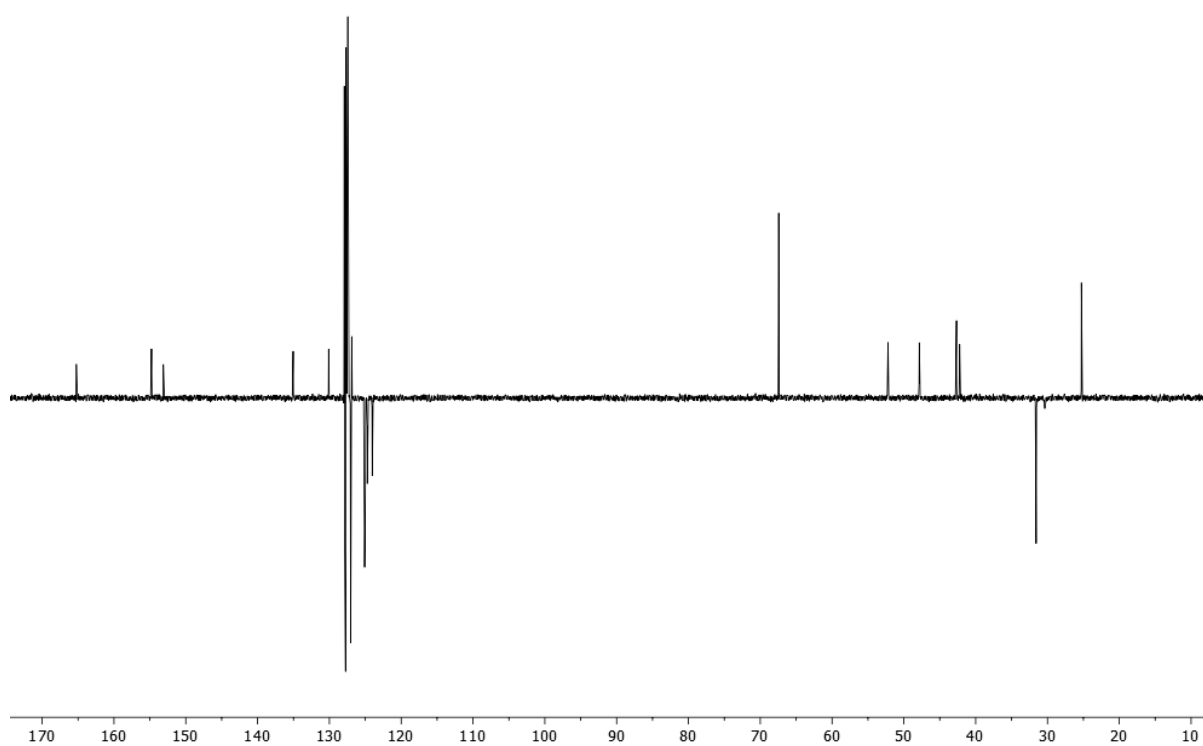

**Figure S7B.** <sup>13</sup>C{<sup>1</sup>H} NMR spectrum of **6** in C<sub>6</sub>D<sub>6</sub>.

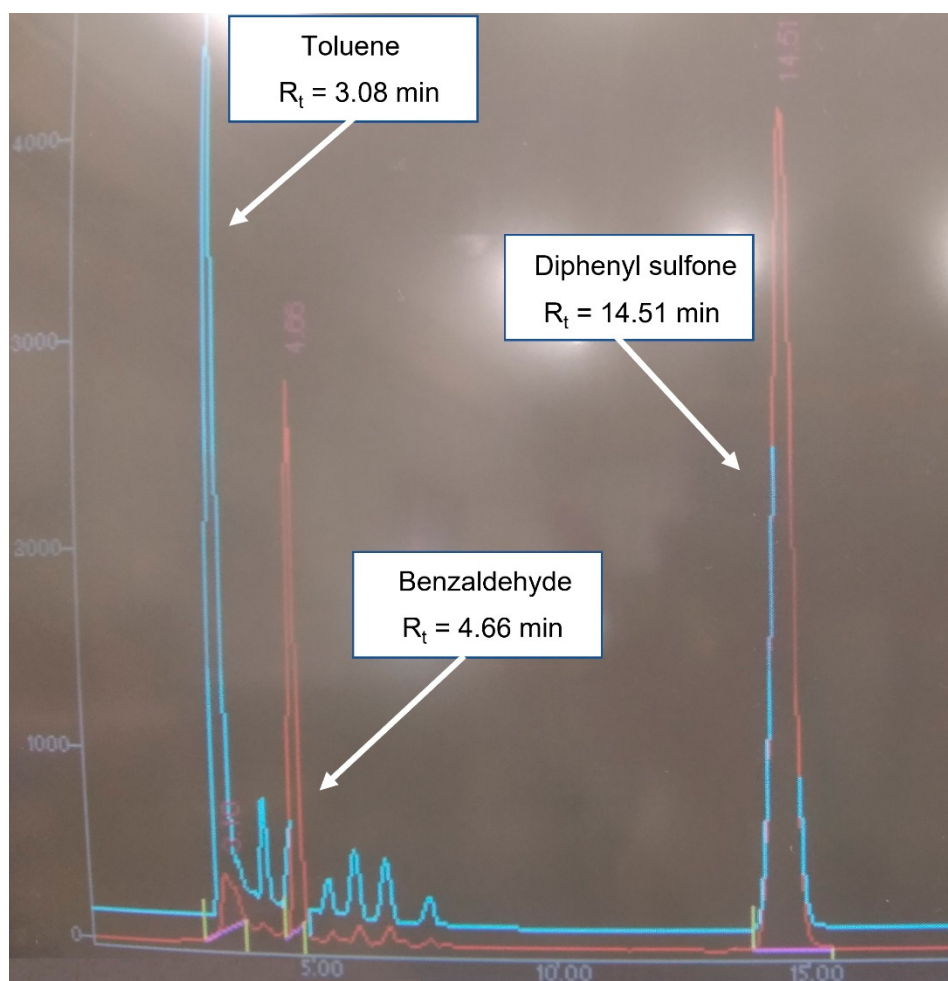

**Figure S8.** HPLC spectra of the products obtained after 4 h at 55 °C in the absence (blue) and in the presence (red) of TEMPO (Table 1, entries 2 and 3, respectively).
